# Supplementary material for: Alternatively Spliced Isoforms of MUC4 and ADAM12 as Biomarkers for Colorectal Cancer Metastasis
Source: MDPI journal article supplement (doi:10.3390/jpm13010135), 2023-01-10
Supplement: s1 [file s1]

**Table S2A: Alignment of MUC4-All Primers using the sample as CCD841, SW480, and SW620 cell lines. Sanger sequencing results were aligned using SnapGene software and NCBI Blast alignment. The confidence scores 98 and 100%.**

| Gene Name        | Cell Line | Amplicon size bp | alignment                                               |                                                                                                                                                                                                                                                                                                                                 | Gaps                                                                      |
|------------------|-----------|------------------|---------------------------------------------------------|---------------------------------------------------------------------------------------------------------------------------------------------------------------------------------------------------------------------------------------------------------------------------------------------------------------------------------|---------------------------------------------------------------------------|
| MUC4-All Forward | CCD841    | 210bp            | MUC4-All - CCD841 Amplicon Forward<br>MUC4-All Isoforms | 1 10 20 30 40 50 60 70 80<br>CTGGTCTA-AGCCCCAGAGCGGCTTACCTGCGTGTCCCAAGTGCAGTAGGGGCTACTGTGACCATGGAGGCCAGTGCCAGCACCTGCC 89<br>16,040 CTGGTCTACAGCCCCAGAGCGGCTTACCTGCGTGTCCCC-GTGCAGTAGGGGCTACTGTGACCATGGAGGCCAGTGCCAGCACCTGCC 16,128<br>16040 16050 16060 16070 16080 16090 16100 16110 16120                                     | Matrix: DNAFULL<br>Gap open penalty: 10.0<br>Gap extend penalty: 1.0      |
|                  |           |                  | MUC4-All - CCD841 Amplicon Forward<br>MUC4-All Isoforms | 90 100 110 120 130 140 150 160 170<br>CAGTGGGCCCGCTGCAAGCTGTGTCTCTTCTCCATCTACAGGCCCTGGGGCGAGCACTGTGAGCACCTGAGCATGAAACTCGAC 174<br>16,129 CAGTGGGCCCGCTGCAAGCTGTGTCTCTTCTCCATCTACAGGCCCTGGGGCGAGCACTGTGAGCACCTGAGCATGAAACTCGAC 16,213<br>16130 16140 16150 16160 16170 16180 16190 16200 16210                                   | Length: 175<br>Identity: 173 / 175 ( 98.86% )<br>Gaps: 2 / 175 ( 1.14% )  |
| MUC4-All Reverse | CCD841    | 210bp            | MUC4-All - CCD841 Amplicon Reverse<br>MUC4-All Isoforms | 1 10 20 30 40 50 60 70 80 90 100<br>GCTTACTTCAGATGCGATGGCTACAAGGGCTACGACCTGGTCTACAGCCCCAGAGCGGCTTACCTGCGTGTCCCAAGTGCAGTAGGGGCTACTGTGACC 100<br>16,004 GCTTACTTCAGATGCGATGGCTACAAGGGCTACGACCTGGTCTACAGCCCCAGAGCGGCTTACCTGCGTGTCCCAAGTGCAGTAGGGGCTACTGTGACC 16,103<br>16010 16020 16030 16040 16050 16060 16070 16080 16090 16100 | Matrix: DNAFULL<br>Gap open penalty: 10.0<br>Gap extend penalty: 1.0      |
|                  |           |                  | MUC4-All - CCD841 Amplicon Reverse<br>MUC4-All Isoforms | 101 110 120 130 140 150 160 170<br>ATGGAGGCCAGTGCCAGCACCTGCCAGTGGGCCCGCTGCAAGCTGTGTCTCTTCTCCATCTACAGGCCCT 172<br>16,104 ATGGAGGCCAGTGCCAGCACCTGCCAGTGGGCCCGCTGCAAGCTGTGTCTCTTCTCCATCTACAGGCCCT 16,175<br>16110 16120 16130 16140 16150 16160 16170                                                                              | Length: 172<br>Identity: 171 / 172 ( 99.42% )<br>Gaps: 0 / 172 ( 0.00% )  |
| MUC4-All Forward | SW480     | 210bp            | MUC4-All - SW480 Amplicon Forward<br>MUC4-All Isoforms  | 1 10 20 30 40 50 60 70 80 90<br>CCCCAGAGCGGCTTACCTGCGTGTCCCGTGCAAGTAGGGGCTACTGTGACCATGGAGGCCAGTGCCAGCACCTGCCAGTGGGCCCGCG 90<br>16,052 CCCCAGAGCGGCTTACCTGCGTGTCCCGTGCAAGTAGGGGCTACTGTGACCATGGAGGCCAGTGCCAGCACCTGCCAGTGGGCCCGCG 16,141<br>16060 16070 16080 16090 16100 16110 16120 16130 16140                                  | Matrix: DNAFULL<br>Gap open penalty: 10.0<br>Gap extend penalty: 1.0      |
|                  |           |                  | MUC4-All - SW480 Amplicon Forward<br>MUC4-All Isoforms  | 91 100 110 120 130 140 150 160<br>TGCAGCTGTGTCTCTTCTCCATCTACAGGCCCTGGGGCGAGCACTGTGAGCACCTGAGCATGAAACTCGAC 162<br>16,142 TGCAGCTGTGTCTCTTCTCCATCTACAGGCCCTGGGGCGAGCACTGTGAGCACCTGAGCATGAAACTCGAC 16,213<br>16150 16160 16170 16180 16190 16200 16210                                                                             | Length: 162<br>Identity: 162 / 162 ( 100.00% )<br>Gaps: 0 / 162 ( 0.00% ) |
| MUC4-All Reverse | SW480     | 210bp            | MUC4-All - SW480 Amplicon Reverse<br>MUC4-All Isoforms  | 1 10 20 30 40 50 60 70 80 90 100<br>GCTTACTTCAGATGCGATGGCTACAAGGGCTACGACCTGGTCTACAGCCCCAGAGCGGCTTACCTGCGTGTCCCGTGCAAGTAGGGGCTACTGTGACC 100<br>16,004 GCTTACTTCAGATGCGATGGCTACAAGGGCTACGACCTGGTCTACAGCCCCAGAGCGGCTTACCTGCGTGTCCCGTGCAAGTAGGGGCTACTGTGACC 16,103<br>16010 16020 16030 16040 16050 16060 16070 16080 16090 16100   | Matrix: DNAFULL<br>Gap open penalty: 10.0<br>Gap extend penalty: 1.0      |
|                  |           |                  | MUC4-All - SW480 Amplicon Reverse<br>MUC4-All Isoforms  | 101 110 120 130 140 150 160 170<br>ATGGAGGCCAGTGCCAGCACCTGCCAGTGGGCCCGCTGCAAGCTGTGTCTCTTCTCCATCTACAGGCCCT 172<br>16,104 ATGGAGGCCAGTGCCAGCACCTGCCAGTGGGCCCGCTGCAAGCTGTGTCTCTTCTCCATCTACAGGCCCT 16,175<br>16110 16120 16130 16140 16150 16160 16170                                                                              | Length: 172<br>Identity: 172 / 172 ( 100.00% )<br>Gaps: 0 / 172 ( 0.00% ) |
| MUC4-All Forward | SW620     | 210bp            | MUC4-All - SW620 Amplicon Forward<br>MUC4-All Isoforms  | 1 10 20 30 40 50 60 70 80 90 100<br>CCCCAGAGCGGCTTACCTGCGTGTCCCGTGCAAGTAGGGGCTACTGTGACCATGGAGGCCAGTGCCAGCACCTGCCAGTGGGCCCGCTGCAAGCTGT 100<br>16,051 CCCCAGAGCGGCTTACCTGCGTGTCCCGTGCAAGTAGGGGCTACTGTGACCATGGAGGCCAGTGCCAGCACCTGCCAGTGGGCCCGCTGCAAGCTGT 16,150<br>16060 16070 16080 16090 16100 16110 16120 16130 16140 16150     | Matrix: DNAFULL<br>Gap open penalty: 10.0<br>Gap extend penalty: 1.0      |
|                  |           |                  | MUC4-All - SW620 Amplicon Forward<br>MUC4-All Isoforms  | 101 110 120 130 140 150 160<br>GTGTCTTCTCCATCTACAGGCCCTGGGGCGAGCACTGTGAGCACCTGAGCATGAAACTCGAC 163<br>16,151 GTGTCTTCTCCATCTACAGGCCCTGGGGCGAGCACTGTGAGCACCTGAGCATGAAACTCGAC 16,213<br>16160 16170 16180 16190 16200 16210                                                                                                        | Length: 163<br>Identity: 163 / 163 ( 100.00% )<br>Gaps: 0 / 163 ( 0.00% ) |
| MUC4-All Reverse | SW620     | 210bp            | MUC4-All - SW620 Amplicon Reverse<br>MUC4-All Isoforms  | 1 10 20 30 40 50 60 70 80 90 100<br>GCTTACTTCAGATGCGATGGCTACAAGGGCTACGACCTGGTCTACAGCCCCAGAGCGGCTTACCTGCGTGTCCCGTGCAAGTAGGGGCTACTGTGACC 100<br>16,004 GCTTACTTCAGATGCGATGGCTACAAGGGCTACGACCTGGTCTACAGCCCCAGAGCGGCTTACCTGCGTGTCCCGTGCAAGTAGGGGCTACTGTGACC 16,103<br>16010 16020 16030 16040 16050 16060 16070 16080 16090 16100   | Matrix: DNAFULL<br>Gap open penalty: 10.0<br>Gap extend penalty: 1.0      |
|                  |           |                  | MUC4-All - SW620 Amplicon Reverse<br>MUC4-All Isoforms  | 101 110 120 130 140 150 160 170<br>ATGGAGGCCAGTGCCAGCACCTGCCAGTGGGCCCGCTGCAAGCTGTGTCTCTTCTCCATCTACA-CGGCCTGG 175<br>16,104 ATGGAGGCCAGTGCCAGCACCTGCCAGTGGGCCCGCTGCAAGCTGTGTCTCTTCTCCATCTACA-CGGCCTGG 16,177<br>16110 16120 16130 16140 16150 16160 16170                                                                        | Length: 175<br>Identity: 174 / 175 ( 99.43% )<br>Gaps: 1 / 175 ( 0.57% )  |

**Table S2B: Alignment of MUC4-16 Primers using the sample as CCD841, SW480, and SW620 cell lines. Sanger sequencing results were aligned using SnapGene software and NCBI Blast alignment. The confidence scores 99 and 100%.**

| Gene Name       | Cell Line | Amplicon size bp | alignment                                             |                                                                                                                                                                                                                                                                                                                                   |  |  |  |  |  |  |  |  | Gaps |                   |         |
|-----------------|-----------|------------------|-------------------------------------------------------|-----------------------------------------------------------------------------------------------------------------------------------------------------------------------------------------------------------------------------------------------------------------------------------------------------------------------------------|--|--|--|--|--|--|--|--|------|-------------------|---------|
| MUC4-16 Forward | CCD841    | 223bp            | MUC4-16 - CCD841 Amplicon Forward<br>MUC4-16 Isoforms | <div>1 ATAAAAACGGCCACATCCCCATCTTCTTCCACCTATGCTGGATAGACACACATCAACAACAAATTACAACGGCCACCATCAACAACATCATTTCAACAATACATT 100</div> <div>1880 ATAAAAACGGCCACATCCCCATCTTCTTCCACCTATGCTGGATAGACACACATCCAACAACAAATTACAACGGCCACCATCAACAACATCATTTCAACAATACATT 1779</div> <div>1880 1890 1900 1910 1920 1930 1940 1950 1960 1970 1980 1990</div> |  |  |  |  |  |  |  |  |      | Matrix:           | DNAFULL |
|                 |           |                  | MUC4-16 - CCD841 Amplicon Forward<br>MUC4-16 Isoforms | <div>101 CCACAAGCACCTCTCTCAGGAATCACCAGCTGTTTCCCAAAGGGGTCACACTCAAGCCCCGCAGACCACACAAGAATC 179</div> <div>1980 CCACAAGCACCTCTCTCAGGAATCACCAGCTGTTTCCCAAAGGGGTCACACTCAAGCCCCGCAGACCACACAAGAATC 2058</div> <div>1980 1990 2000 2010 2020 2030 2040 2050</div>                                                                          |  |  |  |  |  |  |  |  |      | Gap open penalty: | 10.0    |
| MUC4-16 Reverse | CCD841    | 223bp            | MUC4-16 - CCD841 Amplicon Reverse<br>MUC4-16 Isoforms | <div>1 TGGAGAGGCTCTTCTCAGCAGCCCAAGCTACAGTGTGACTCAGATGATAAAAACGGCCACATCCCCATCTTCTTCCACCTATGCTGGATAGACACACATCA 100</div> <div>1834 TGGAGAGGCTCTTCTCAGCAGCCCAAGCTACAGTGTGACTCAGATGATAAAAACGGCCACATCCCCATCTTCTTCCACCTATGCTGGATAGACACACATCC 1933</div> <div>1840 1850 1860 1870 1880 1890 1900 1910 1920 1930</div>                    |  |  |  |  |  |  |  |  |      | Matrix:           | DNAFULL |
|                 |           |                  | MUC4-16 - CCD841 Amplicon Reverse<br>MUC4-16 Isoforms | <div>101 CAACAAATTACAACGGCACCATTCAACAATCATTTCAACAATACATTTCCACAAGCACCTCTCTCAGGAATCACCAGCTG 179</div> <div>1934 CAACAAATTACAACGGCACCATTCAACAATCATTTCAACAATACATTTCCACAAGCACCTCTCTCAGGAATCACCAGCTG 2012</div> <div>1940 1950 1960 1970 1980 1990 2000 2010</div>                                                                      |  |  |  |  |  |  |  |  |      | Gap open penalty: | 10.0    |
| MUC4-16 Forward | SW480     | 223bp            | MUC4-16 - SW480 Amplicon Forward<br>MUC4-16 Isoforms  | <div>1 AAAACGGCCACATCCCCATCTTCTTCCACCTATGCTGGATAGACACACATCAACAACAAATTACAACGGCACCATTCAACAACATCATTTCAACAATACATTCCA 100</div> <div>1883 AAAACGGCCACATCCCCATCTTCTTCCACCTATGCTGGATAGACACACATCCAACAACAAATTACAACGGCACCATTCAACAACATCATTTCAACAATACATTCCA 1982</div> <div>1890 1900 1910 1920 1930 1940 1950 1960 1970 1980</div>           |  |  |  |  |  |  |  |  |      | Matrix:           | DNAFULL |
|                 |           |                  | MUC4-16 - SW480 Amplicon Forward<br>MUC4-16 Isoforms  | <div>101 CAAGCACCTCTCTCTCAGGAATCACCAGCTGTTTCCCAAAGGGGTCACACTCAAGCCCCGCAGACCACACAAGAAT 175</div> <div>1983 CAAGCACCTCTCTCTCAGGAATCACCAGCTGTTTCCCAAAGGGGTCACACTCAAGCCCCGCAGACCACACAAGAAT 2057</div> <div>1990 2000 2010 2020 2030 2040 2050</div>                                                                                   |  |  |  |  |  |  |  |  |      | Gap open penalty: | 10.0    |
| MUC4-16 Reverse | SW480     | 223bp            | MUC4-16 - SW480 Amplicon Reverse<br>MUC4-16 Isoforms  | <div>1 TGGAGAGGCTCTTCTCAGCAGCCCAAGCTACAGTGTGACTCAGATGATAAAAACGGCCACATCCCCATCTTCTTCCACCTATGCTGGATAGACACACATCA 100</div> <div>1834 TGGAGAGGCTCTTCTCAGCAGCCCAAGCTACAGTGTGACTCAGATGATAAAAACGGCCACATCCCCATCTTCTTCCACCTATGCTGGATAGACACACATCC 1933</div> <div>1840 1850 1860 1870 1880 1890 1900 1910 1920 1930</div>                    |  |  |  |  |  |  |  |  |      | Matrix:           | DNAFULL |
|                 |           |                  | MUC4-16 - SW480 Amplicon Reverse<br>MUC4-16 Isoforms  | <div>101 CAACAAATTACAACGGCACCATTCAACAATCATTTCAACAATACATTTCCACAAGCACCTCTCTCTCAGG 167</div> <div>1934 CAACAAATTACAACGGCACCATTCAACAATCATTTCCACAAGCACCTCTCTCTCAGG 2000</div> <div>1940 1950 1960 1970 1980 1990 2000</div>                                                                                                            |  |  |  |  |  |  |  |  |      | Gap open penalty: | 10.0    |
| MUC4-16 Forward | SW620     | 223bp            | MUC4-16 - SW620 Amplicon Forward<br>MUC4-16 Isoforms  | <div>9 TGACTCAGATGATAAAAACGGCCACATCCCCATCTTCTTCCACCTATGCTGGATAGACACACATCAACAACAAATTACAACGGCACCATTCAACAACATCATTT 108</div> <div>1869 TGACTCAGATGATAAAAACGGCCACATCCCCATCTTCTTCCACCTATGCTGGATAGACACACATCCAACAACAAATTACAACGGCACCATTCAACAACATCATTT 1968</div> <div>1870 1880 1890 1900 1910 1920 1930 1940 1950 1960</div>             |  |  |  |  |  |  |  |  |      | Matrix:           | DNAFULL |
|                 |           |                  | MUC4-16 - SW620 Amplicon Forward<br>MUC4-16 Isoforms  | <div>109 CAAATCATTTCAACAATACATTTCCACAAGCACCTCTCTCTCAGGAATCACCAGCTGTTTCCCAAAGGGGTCACACTCAAGCCCCGCAGACCA 198</div> <div>1969 CAAATCATTTCAACAATACATTTCCACAAGCACCTCTCTCTCAGGAATCACCAGCTGTTTCCCAAAGGGGTCACACTCAAGCCCCGCAGACCA 2058</div> <div>1970 1980 1990 2000 2010 2020 2030 2040 2050</div>                                       |  |  |  |  |  |  |  |  |      | Gap open penalty: | 10.0    |
| MUC4-16 Reverse | SW620     | 223bp            | MUC4-16 - SW620 Amplicon Reverse<br>MUC4-16 Isoforms  | <div>1 TGGAGAGGCTCTTCTCAGCAGCCCAAGCTACAGTGTGACTCAGATGATAAAAACGGCCACATCCCCATCTTCTTCCACCTATGCTGGATAGACACACATCA 100</div> <div>1834 TGGAGAGGCTCTTCTCAGCAGCCCAAGCTACAGTGTGACTCAGATGATAAAAACGGCCACATCCCCATCTTCTTCCACCTATGCTGGATAGACACACATCC 1933</div> <div>1840 1850 1860 1870 1880 1890 1900 1910 1920 1930</div>                    |  |  |  |  |  |  |  |  |      | Matrix:           | DNAFULL |
|                 |           |                  | MUC4-16 - SW620 Amplicon Reverse<br>MUC4-16 Isoforms  | <div>101 CAACAAATTACAACGGCACCATTCAACAATCATTTCAACAATACATTTCCACAAGCACCTCTCTCTCAGGAATCACCAGCTG 179</div> <div>1934 CAACAAATTACAACGGCACCATTCAACAATCATTTCAACAATACATTTCCACAAGCACCTCTCTCTCAGGAATCACCAGCTG 2012</div> <div>1940 1950 1960 1970 1980 1990 2000 2010</div>                                                                  |  |  |  |  |  |  |  |  |      | Gap open penalty: | 10.0    |

**Table S2C: Alignment of MUC4-16 Primers using the sample as CCD841, SW480, and SW620 cell lines. Sanger sequencing results were aligned using SnapGene software and NCBI Blast alignment. The confidence scores 95 and 100%.**

| Gene Name      | Cell Line | Amplicon size bp | alignment                                                                                                    |                                                                                                                                                                                                                                                                                                                                                                                                                                              | Gaps                                                                                                                                                                                                 |
|----------------|-----------|------------------|--------------------------------------------------------------------------------------------------------------|----------------------------------------------------------------------------------------------------------------------------------------------------------------------------------------------------------------------------------------------------------------------------------------------------------------------------------------------------------------------------------------------------------------------------------------------|------------------------------------------------------------------------------------------------------------------------------------------------------------------------------------------------------|
| MUC4-4 Forward | CCD841    | 158bp            | MUC4-4 - CCD841 Amplicon Forward<br>MUC4-4 Isoform                                                           | <div>1020114</div> <div>120130140150160170180190200</div> <div>1 TGAAGGGGGCATGCTGGACGTGGGTCCCTGGGTGTCCCTGAGCTGCCTGTGTCTCTGCCTCCTCCGCATGTGGTCCCAGGAATCA 87</div> <div>114 TGAAGGGGGGCACTGCTGGAGGAGGGTCCCTGGGTGTCCCTGAGCTGCCTGTGTCTCTGCCTCCTCCGCATGTGGTCCCAGGAATGA 200</div>                                                                                                                                                                   | <div>Matrix: DNAFULL</div> <div>Gap open penalty: 10.0</div> <div>Gap extend penalty: 1.0</div> <div>Length: 87</div> <div>Identity: 83 / 87 ( 95.40% )</div> <div>Gaps: 0 / 87 ( 0.00% )</div>      |
| MUC4-4 Reverse | CCD841    | 158bp            | MUC4-4 - CCD841 Amplicon Reverse<br>MUC4-4 Isoform<br><br>MUC4-4 - CCD841 Amplicon Reverse<br>MUC4-4 Isoform | <div>102030405060708090100</div> <div>41 GTCTGCTCCTCACACTGCAAGCTGCTGGGCCGTGGAGCTTCCCTAGGGAGCCAGGGGGACTTTTGCCGACGCCATGAAGGGGGGCACGCTGGAGGAGGGTCC 100</div> <div>41 GTCTGCTCCTCACACTGCAAGCTGCTGGGCCGTGGAGCTTCCCTAGGGAGCCAGGGGGACTTTTGCCGACGCCATGAAGGGGGGCACGCTGGAGGAGGGTCC 140</div> <div>110120</div> <div>101 CCTGGGTGTCCCTGAGCTGCCTG 123</div> <div>141 CCTGGGTGTCCCTGAGCTGCCTG 163</div> <div>150160</div>                                 | <div>Matrix: DNAFULL</div> <div>Gap open penalty: 10.0</div> <div>Gap extend penalty: 1.0</div> <div>Length: 123</div> <div>Identity: 122 / 123 ( 99.19% )</div> <div>Gaps: 0 / 123 ( 0.00% )</div>  |
| MUC4-4 Forward | SW480     | 158bp            | MUC4-4 - SW480 Amplicon Forward<br>MUC4-4 Isoform<br><br>MUC4-4 - SW480 Amplicon Forward<br>MUC4-4 Isoform   | <div>102030405060708090100</div> <div>1 CCCAGGGAGCCAGGGGGACTTTTGCCGACGCCATGAAGGGGGGCACGCTGGAGGAGGGTCCCTGGGTGTCCCTGAGCTGCCTGTGTCTCTGCCTCCTTCC 100</div> <div>81 CCCAGGGAGCCAGGGGGACTTTTGCCGACGCCATGAAGGGGGGCACGCTGGAGGAGGGTCCCTGGGTGTCCCTGAGCTGCCTGTGTCTCTGCCTCCTTCC 180</div> <div>90100110120130140150160170180</div> <div>110</div> <div>101 GCATGTGTGCCAGGAAT 118</div> <div>181 GCATGTGTGCCAGGAAT 198</div> <div>190</div>               | <div>Matrix: DNAFULL</div> <div>Gap open penalty: 10.0</div> <div>Gap extend penalty: 1.0</div> <div>Length: 118</div> <div>Identity: 118 / 118 ( 100.00% )</div> <div>Gaps: 0 / 118 ( 0.00% )</div> |
| MUC4-4 Reverse | SW480     | 158bp            | MUC4-4 - SW480 Amplicon Reverse<br>MUC4-4 Isoform<br><br>MUC4-4 - SW480 Amplicon Reverse<br>MUC4-4 Isoform   | <div>102030405060708090100</div> <div>1 GTCTGCTCCTCACACTGCAAGCTGCTGGGCCGTGGAGCTTCCCAAGGGAGCCAGGGGGACTTTTGCCGACGCCATGAAGGGGGGCACGCTGGAGGAGGGTCC 100</div> <div>41 GTCTGCTCCTCACACTGCAAGCTGCTGGGCCGTGGAGCTTCCCAAGGGAGCCAGGGGGACTTTTGCCGACGCCATGAAGGGGGGCACGCTGGAGGAGGGTCC 140</div> <div>5060708090100110120130140</div> <div>110120</div> <div>101 CCTGGGTGTCCCTGAGCTGC 120</div> <div>141 CCTGGGTGTCCCTGAGCTGC 160</div> <div>150160</div>   | <div>Matrix: DNAFULL</div> <div>Gap open penalty: 10.0</div> <div>Gap extend penalty: 1.0</div> <div>Length: 120</div> <div>Identity: 120 / 120 ( 100.00% )</div> <div>Gaps: 0 / 120 ( 0.00% )</div> |
| MUC4-4 Forward | SW620     | 158bp            | MUC4-4 - SW620 Amplicon Forward<br>MUC4-4 Isoform<br><br>MUC4-4 - SW620 Amplicon Forward<br>MUC4-4 Isoform   | <div>102030405060708090100</div> <div>1 AGGGAGCCAGGGGGACTTTTGCCGACGCCATGAAGGGGGGCACGCTGGAGGAGGGTCCCTGGGTGTCCCTGAGCTGCCTGTGTCTCTGCCTCCTTCCGCA 100</div> <div>84 AGGGAGCCAGGGGGACTTTTGCCGACGCCATGAAGGGGGGCACGCTGGAGGAGGGTCCCTGGGTGTCCCTGAGCTGCCTGTGTCTCTGCCTCCTTCCGCA 183</div> <div>90100110120130140150160170180</div> <div>110</div> <div>101 TGTGGTCCCAGGAAT 115</div> <div>184 TGTGGTCCCAGGAAT 198</div> <div>190</div>                   | <div>Matrix: DNAFULL</div> <div>Gap open penalty: 10.0</div> <div>Gap extend penalty: 1.0</div> <div>Length: 115</div> <div>Identity: 115 / 115 ( 100.00% )</div> <div>Gaps: 0 / 115 ( 0.00% )</div> |
| MUC4-4 Reverse | SW620     | 158bp            | MUC4-4 - SW620 Amplicon Reverse<br>MUC4-4 Isoform<br><br>MUC4-4 - SW620 Amplicon Reverse<br>MUC4-4 Isoform   | <div>102030405060708090100</div> <div>1 GTCTGCTCCTCACACTGCAAGCTGCTGGGCCGTGGAGCTTCCCAAGGGAGCCAGGGGGACTTTTGCCGACGCCATGAAGGGGGGCACGCTGGAGGAGGGTCC 100</div> <div>41 GTCTGCTCCTCACACTGCAAGCTGCTGGGCCGTGGAGCTTCCCAAGGGAGCCAGGGGGACTTTTGCCGACGCCATGAAGGGGGGCACGCTGGAGGAGGGTCC 140</div> <div>5060708090100110120130140</div> <div>110120</div> <div>101 CCTGGGTGTCCCTGAGCTGCC 121</div> <div>141 CCTGGGTGTCCCTGAGCTGCC 161</div> <div>150160</div> | <div>Matrix: DNAFULL</div> <div>Gap open penalty: 10.0</div> <div>Gap extend penalty: 1.0</div> <div>Length: 121</div> <div>Identity: 121 / 121 ( 100.00% )</div> <div>Gaps: 0 / 121 ( 0.00% )</div> |
