# Supplementary material for: Alternatively Spliced Isoforms of MUC4 and ADAM12 as Biomarkers for Colorectal Cancer Metastasis
Source: MDPI journal article supplement (doi:10.3390/jpm13010135), 2023-01-10
Supplement: s1 [file s1]

Table S3A: Alignment of MUC4-6 primers using the sample as CCD841, SW480, and SW620 cell lines. Sanger sequencing results were aligned using SnapGene software and NCBI Blast alignment. The confidence scores 80 and 100%.

| Gene Name      | Cell Line | Amplicon size bp | alignment                                          | Gaps                                                                                                                                                                     |
|----------------|-----------|------------------|----------------------------------------------------|--------------------------------------------------------------------------------------------------------------------------------------------------------------------------|
| MUC4-6 Forward | CCD841    | 180bp            | MUC4-6 - CCD841 Amplicon Forward<br>MUC4-6 Isoform | <div>Matrix: DNAFULL<br/>Gap open penalty: 10.0<br/>Gap extend penalty: 1.0</div> <div>Length: 242<br/>Identity: 227 / 242 ( 93.80% )<br/>Gaps: 0 / 242 ( 0.00% )</div>  |
|                |           |                  | MUC4-6 - CCD841 Amplicon Forward<br>MUC4-6 Isoform |                                                                                                                                                                          |
|                |           |                  | MUC4-6 - CCD841 Amplicon Forward<br>MUC4-6 Isoform |                                                                                                                                                                          |
| MUC4-6 Forward | CCD841    | 320bp            | MUC4-6 - CCD841 Amplicon Forward<br>MUC4-6 Isoform | <div>Matrix: DNAFULL<br/>Gap open penalty: 10.0<br/>Gap extend penalty: 1.0</div> <div>Length: 269<br/>Identity: 256 / 269 ( 95.17% )<br/>Gaps: 0 / 269 ( 0.00% )</div>  |
|                |           |                  | MUC4-6 - CCD841 Amplicon Forward<br>MUC4-6 Isoform |                                                                                                                                                                          |
|                |           |                  | MUC4-6 - CCD841 Amplicon Forward<br>MUC4-6 Isoform |                                                                                                                                                                          |
| MUC4-6 Forward | SW480     | 180bp            | MUC4-6 - SW480 Amplicon Forward<br>MUC4-6 Isoform  | <div>Matrix: DNAFULL<br/>Gap open penalty: 10.0<br/>Gap extend penalty: 1.0</div> <div>Length: 145<br/>Identity: 143 / 145 ( 98.62% )<br/>Gaps: 1 / 145 ( 0.69% )</div>  |
|                |           |                  | MUC4-6 - SW480 Amplicon Forward<br>MUC4-6 Isoform  |                                                                                                                                                                          |
|                |           |                  | MUC4-6 - SW480 Amplicon Forward<br>MUC4-6 Isoform  |                                                                                                                                                                          |
| MUC4-6 Forward | SW480     | 320bp            | MUC4-6 - SW480 Amplicon Forward<br>MUC4-6 Isoform  | <div>Matrix: DNAFULL<br/>Gap open penalty: 10.0<br/>Gap extend penalty: 1.0</div> <div>Length: 245<br/>Identity: 195 / 245 ( 79.59% )<br/>Gaps: 18 / 245 ( 7.35% )</div> |
|                |           |                  | MUC4-6 - SW480 Amplicon Forward<br>MUC4-6 Isoform  |                                                                                                                                                                          |
|                |           |                  | MUC4-6 - SW480 Amplicon Forward<br>MUC4-6 Isoform  |                                                                                                                                                                          |
| MUC4-6 Forward | SW620     | 180bp            | MUC4-6 - SW620 Amplicon Forward<br>MUC4-6 Isoform  | <div>Matrix: DNAFULL<br/>Gap open penalty: 10.0<br/>Gap extend penalty: 1.0</div> <div>Length: 226<br/>Identity: 208 / 226 ( 92.04% )<br/>Gaps: 2 / 226 ( 0.88% )</div>  |
|                |           |                  | MUC4-6 - SW620 Amplicon Forward<br>MUC4-6 Isoform  |                                                                                                                                                                          |
|                |           |                  | MUC4-6 - SW620 Amplicon Forward<br>MUC4-6 Isoform  |                                                                                                                                                                          |
| MUC4-6 Reverse | SW620     | 180bp            | MUC4-6 - SW620 Amplicon Reverse<br>MUC4-6 Isoform  | <div>Matrix: DNAFULL<br/>Gap open penalty: 10.0<br/>Gap extend penalty: 1.0</div> <div>Length: 144<br/>Identity: 139 / 144 ( 96.53% )<br/>Gaps: 0 / 144 ( 0.00% )</div>  |
|                |           |                  | MUC4-6 - SW620 Amplicon Reverse<br>MUC4-6 Isoform  |                                                                                                                                                                          |
|                |           |                  | MUC4-6 - SW620 Amplicon Reverse<br>MUC4-6 Isoform  |                                                                                                                                                                          |
| MUC4-6 Forward | SW620     | 320bp            | MUC4-6 - SW620 Amplicon Forward<br>MUC4-6 Isoform  | <div>Matrix: DNAFULL<br/>Gap open penalty: 10.0<br/>Gap extend penalty: 1.0</div> <div>Length: 123<br/>Identity: 121 / 123 ( 98.37% )<br/>Gaps: 0 / 123 ( 0.00% )</div>  |
|                |           |                  | MUC4-6 - SW620 Amplicon Forward<br>MUC4-6 Isoform  |                                                                                                                                                                          |
|                |           |                  | MUC4-6 - SW620 Amplicon Forward<br>MUC4-6 Isoform  |                                                                                                                                                                          |
| MUC4-6 Reverse | SW620     | 320bp            | MUC4-6 - SW620 Amplicon Reverse<br>MUC4-6 Isoform  | <div>Matrix: DNAFULL<br/>Gap open penalty: 10.0<br/>Gap extend penalty: 1.0</div> <div>Length: 139<br/>Identity: 129 / 139 ( 92.81% )<br/>Gaps: 1 / 139 ( 0.72% )</div>  |
|                |           |                  | MUC4-6 - SW620 Amplicon Reverse<br>MUC4-6 Isoform  |                                                                                                                                                                          |
|                |           |                  | MUC4-6 - SW620 Amplicon Reverse<br>MUC4-6 Isoform  |                                                                                                                                                                          |

Table S3B: Alignment of MUC4-1 primers using the sample as CCD841, SW480, and SW620 cell lines. Sanger sequencing results were aligned using SnapGene software and NCBI Blast alignment. The confidence scores 91 and 100%.

| Gene Name      | Cell Line | Amplicon size bp | alignment                                          | Gaps                                                                       |
|----------------|-----------|------------------|----------------------------------------------------|----------------------------------------------------------------------------|
| MUC4-1 Forward | CCD841    | 282bp            | MUC4-1 - CCD841 Amplicon Forward<br>MUC4-1 Isoform | Matrix: DNAFULL<br>Gap open penalty: 10.0<br>Gap extend penalty: 1.0       |
|                |           |                  | MUC4-1 - CCD841 Amplicon Forward<br>MUC4-1 Isoform | Length: 166<br>Identity: 158 / 166 ( 95.18 % )<br>Gaps: 0 / 166 ( 0.00 % ) |
| MUC4-1 Forward | CCD841    | 240bp            | MUC4-1 - CCD841 Amplicon Forward<br>MUC4-1 Isoform | Matrix: DNAFULL<br>Gap open penalty: 10.0<br>Gap extend penalty: 1.0       |
|                |           |                  | MUC4-1 - CCD841 Amplicon Forward<br>MUC4-1 Isoform | Length: 197<br>Identity: 191 / 197 ( 96.95 % )<br>Gaps: 1 / 197 ( 0.51 % ) |
| MUC4-1 Reverse | CCD841    | 240bp            | MUC4-1 - CCD841 Amplicon Reverse<br>MUC4-1 Isoform | Matrix: DNAFULL<br>Gap open penalty: 10.0<br>Gap extend penalty: 1.0       |
|                |           |                  | MUC4-1 - CCD841 Amplicon Reverse<br>MUC4-1 Isoform | Length: 186<br>Identity: 171 / 186 ( 91.84 % )<br>Gaps: 0 / 186 ( 0.00 % ) |
| MUC4-1 Forward | SW480     | 240bp            | MUC4-1 - SW480 Amplicon Forward<br>MUC4-1 Isoform  | Matrix: DNAFULL<br>Gap open penalty: 10.0<br>Gap extend penalty: 1.0       |
|                |           |                  | MUC4-1 - SW480 Amplicon Forward<br>MUC4-1 Isoform  | Length: 197<br>Identity: 191 / 197 ( 96.95 % )<br>Gaps: 1 / 197 ( 0.51 % ) |
| MUC4-1 Forward | SW480     | 282bp            | MUC4-1 - SW480 Amplicon Forward<br>MUC4-1 Isoform  | Matrix: DNAFULL<br>Gap open penalty: 10.0<br>Gap extend penalty: 1.0       |
|                |           |                  | MUC4-1 - SW480 Amplicon Forward<br>MUC4-1 Isoform  | Length: 221<br>Identity: 206 / 221 ( 93.21 % )<br>Gaps: 0 / 221 ( 0.00 % ) |
| MUC4-1 Reverse | SW620     | 282bp            | MUC4-1 - SW620 Amplicon Forward<br>MUC4-1 Isoform  | Matrix: DNAFULL<br>Gap open penalty: 10.0<br>Gap extend penalty: 1.0       |
|                |           |                  | MUC4-1 - SW620 Amplicon Forward<br>MUC4-1 Isoform  | Length: 379<br>Identity: 354 / 379 ( 93.40 % )<br>Gaps: 0 / 379 ( 0.00 % ) |
| MUC4-1 Reverse | SW620     | 282bp            | MUC4-1 - SW620 Amplicon Reverse<br>MUC4-1 Isoform  | Matrix: DNAFULL<br>Gap open penalty: 10.0<br>Gap extend penalty: 1.0       |
|                |           |                  | MUC4-1 - SW620 Amplicon Reverse<br>MUC4-1 Isoform  | Length: 268<br>Identity: 249 / 268 ( 92.91 % )<br>Gaps: 1 / 268 ( 0.37 % ) |
| MUC4-1 Reverse | SW620     | 240bp            | MUC4-1 - SW620 Amplicon Reverse<br>MUC4-1 Isoform  | Matrix: DNAFULL<br>Gap open penalty: 10.0<br>Gap extend penalty: 1.0       |
|                |           |                  | MUC4-1 - SW620 Amplicon Reverse<br>MUC4-1 Isoform  | Length: 198<br>Identity: 190 / 198 ( 95.96 % )<br>Gaps: 2 / 198 ( 1.01 % ) |
