# Supplementary material for: Alternatively Spliced Isoforms of MUC4 and ADAM12 as Biomarkers for Colorectal Cancer Metastasis
Source: MDPI journal article supplement (doi:10.3390/jpm13010135), 2023-01-10
Supplement: s1 [file s1]

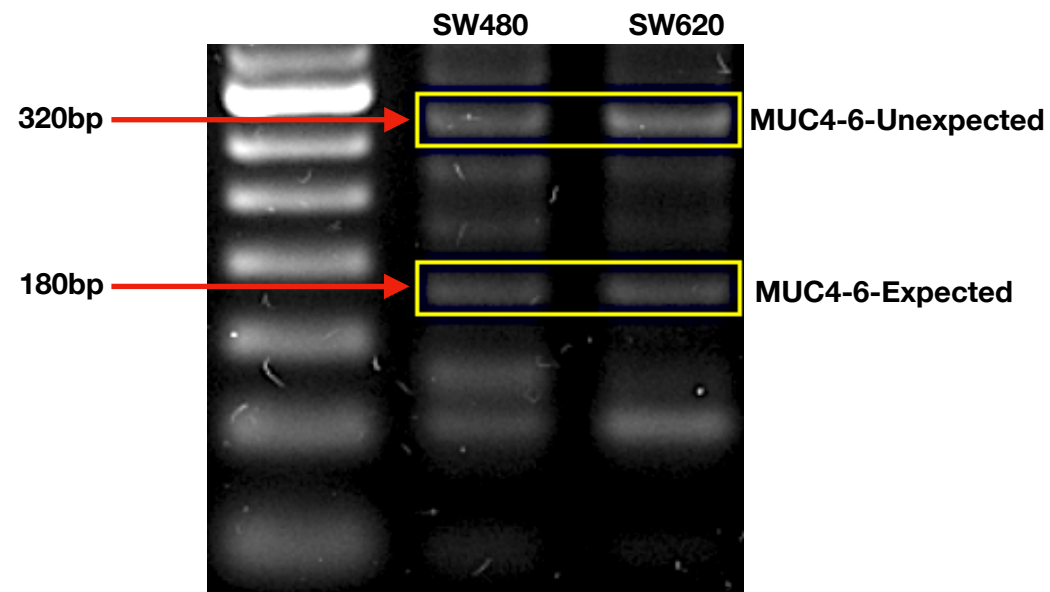

**Supplementary Figure S3A:** The primers that were designed to detect MUC4-6 showed multiple bands. The yellow box showed the excised bands. The templates were the cell lines SW480 and SW620.

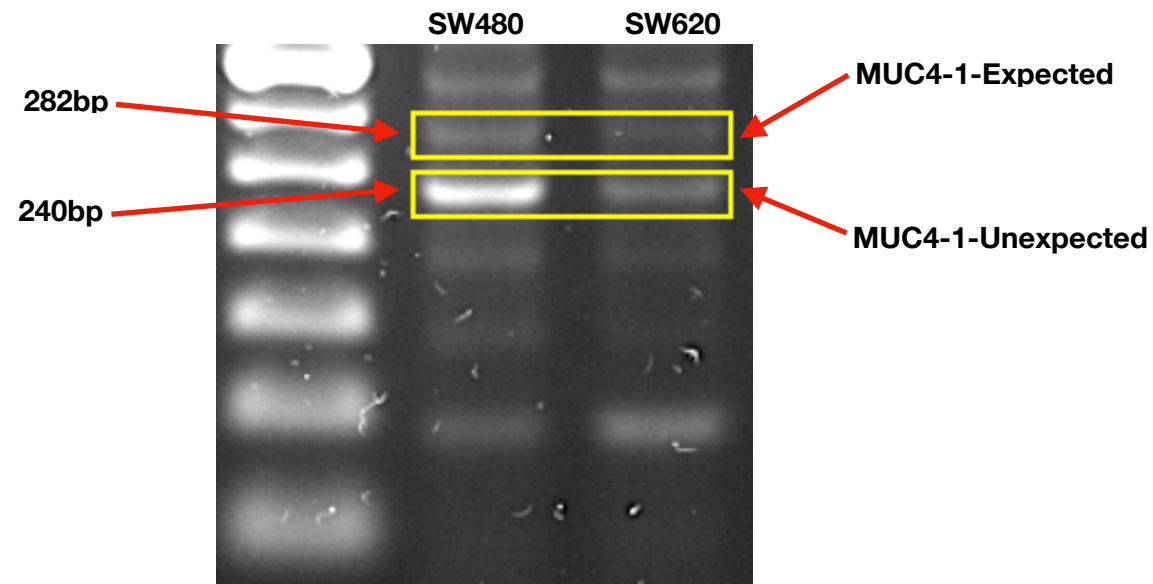

**Supplementary Figure S3A:** The primers that were designed to detect MUC4-1 showed multiple bands. The yellow box showed the excised bands. The templates were the cell lines SW480 and SW620.
