# Supplementary material for: Alternatively Spliced Isoforms of MUC4 and ADAM12 as Biomarkers for Colorectal Cancer Metastasis
Source: MDPI journal article supplement (doi:10.3390/jpm13010135), 2023-01-10
Supplement: s1 [file s1]

**Table S1A: Alignment of ADAM12-All Primers using the sample as CCD841, SW480, and SW620 cell lines. Sanger sequencing results were aligned using SnapGene software and NCBI Blast alignment. The confidence scores 99 and 100%.**

| Gene Name                 | Cell Line | Amplicon size bp | alignment                                                   |                                                                                                                                                                                                                                                                                                        | Gaps                                                                      |
|---------------------------|-----------|------------------|-------------------------------------------------------------|--------------------------------------------------------------------------------------------------------------------------------------------------------------------------------------------------------------------------------------------------------------------------------------------------------|---------------------------------------------------------------------------|
| ADAM12-<br>All<br>Forward | CCD841    | 198bp            | ADAM12-All - CCD841 Amplicon Forward<br>ADAM12-All Isoforms | <div>102030405060708090</div> <div>1CCATTTCCCATGGTGTTCAGCAGTTGCAGCAGGAAGGACTTTGGAGACCAGCCTGGAGAAAGGAATGGGGGTGTGCCTGTTTAACCTGCCG90</div> <div>1469CCATTTCCCATGGTGTTCAGCAGTTGCAGCAGGAAGGACTTTGGAGACCAGCCTGGAGAAAGGAATGGGGGTGTGCCTGTTTAACCTGCCG1558</div> <div>147014801490150015101520153015401550</div> | Matrix: DNAFULL<br>Gap open penalty: 10.0<br>Gap extend penalty: 1.0      |
|                           |           |                  | ADAM12-All - CCD841 Amplicon Forward<br>ADAM12-All Isoforms | <div>100110120130140</div> <div>91GAAGTCAGGGAAGTCTTTCCGGGGCCAGAAAGTGTGGGAACAGATTTGTGGA140</div> <div>1559GAAGTCAGGGAAGTCTTTCCGGGGCCAGAAAGTGTGGGAACAGATTTGTGGA1608</div> <div>15601570158015901600</div>                                                                                                | Length: 140<br>Identity: 140 / 140 ( 100.00% )<br>Gaps: 0 / 140 ( 0.00% ) |
| ADAM12-<br>All<br>Reverse | CCD841    | 198bp            | ADAM12-All - CCD841 Amplicon Reverse<br>ADAM12-All Isoforms | <div>102030405060708090</div> <div>1GTAGCTGTCAAATGGCGGTGAGAAAGGAGGCTGCATCATGAACGCTTCCACCGGGTACCCATTTCCCATGGTGTTCAGCAGTTGCAGCA90</div> <div>1432GTAGCTGTCAAATGGCGGTGAGAAAGGAGGCTGCATCATGAACGCTTCCACCGGGTACCCATTTCCCATGGTGTTCAGCAGTTGCAGCA1521</div> <div>144014501460147014801490150015101520</div>     | Matrix: DNAFULL<br>Gap open penalty: 10.0<br>Gap extend penalty: 1.0      |
|                           |           |                  | ADAM12-All - CCD841 Amplicon Reverse<br>ADAM12-All Isoforms | <div>100110120130140150</div> <div>91GGAAGGACTTTGGAGACCAGCCTGGAGAAAGGAATGGGGGTGTGCCTGTTAACCTGCCGGAAGTCAGG157</div> <div>1522GGAAGGACTTTGGAGACCAGCCTGGAGAAAGGAATGGGGGTGTGCCTGTTAACCTGCCGGAAGTCAGG1589</div> <div>153015401550156015701580</div>                                                         | Length: 158<br>Identity: 157 / 158 ( 99.37% )<br>Gaps: 1 / 158 ( 0.63% )  |
| ADAM12-<br>All<br>Forward | SW480     | 198bp            | ADAM12-All - SW480 Amplicon Forward<br>ADAM12-All Isoforms  | <div>1020304050607080</div> <div>1ACGCTT-CACCGGGTA-CCATTTCCCATGGTGTTCAGCAGTTGCAGCAGGAAGGACTTTGGAGACCAGCCTGGAGAAAGGAATGGGGGTGT88</div> <div>1465ACGCTTCCACCGGGTACCATTTCCCATGGTGTTCAGCAGTTGCAGCAGGAAGGACTTTGGAGACCAGCCTGGAGAAAGGAATGGGGGTGT1554</div> <div>147014801490150015101520153015401550</div>    | Matrix: DNAFULL<br>Gap open penalty: 10.0<br>Gap extend penalty: 1.0      |
|                           |           |                  | ADAM12-All - SW480 Amplicon Forward<br>ADAM12-All Isoforms  | <div>90100110120130140150</div> <div>89GCCTGTTTAACCTGCCGGAAGTCAGGGAGTCTTTCCGGGGCCAGAAAGTGTGGGAACAGATTTGTGGA155</div> <div>1555GCCTGTTTAACCTGCCGGAAGTCAGGGAGTCTTTCCGGGGCCAGAAAGTGTGGGAACAGATTTGTGGA1621</div> <div>1560157015801590160016101620</div>                                                   | Length: 157<br>Identity: 155 / 157 ( 98.73% )<br>Gaps: 2 / 157 ( 1.27% )  |
| ADAM12-<br>All<br>Reverse | SW480     | 198bp            | ADAM12-All - Sw480 Amplicon Reverse<br>ADAM12-All Isoforms  | <div>102030405060708090</div> <div>1TGTAGCTGTCAAATGGCGGTGAGAAAGGAGGCTGCATCATGAACGCTTCCACCGGGTACCCATTTCCCATGGTGTTCAGCAGTTGCAGC90</div> <div>1431TGTAGCTGTCAAATGGCGGTGAGAAAGGAGGCTGCATCATGAACGCTTCCACCGGGTACCCATTTCCCATGGTGTTCAGCAGTTGCAGC1520</div> <div>144014501460147014801490150015101520</div>     | Matrix: DNAFULL<br>Gap open penalty: 10.0<br>Gap extend penalty: 1.0      |
|                           |           |                  | ADAM12-All - Sw480 Amplicon Reverse<br>ADAM12-All Isoforms  | <div>100110120130140150160</div> <div>91AGGAAGGACTTTGGAGACCAGCCTGGAGAAAGGAATGGGGGTGTGCCTGTTTAACCTGCCGGAAGTCAGGGAG162</div> <div>1521AGGAAGGACTTTGGAGACCAGCCTGGAGAAAGGAATGGGGGTGTGCCTGTTTAACCTGCCGGAAGTCAGGGAG1592</div> <div>1530154015501560157015801590</div>                                        | Length: 162<br>Identity: 162 / 162 ( 100.00% )<br>Gaps: 0 / 162 ( 0.00% ) |
| ADAM12-<br>All<br>Forward | SW620     | 198bp            | ADAM12-All - SW620 Amplicon Forward<br>ADAM12-All Isoforms  | <div>102030405060708090</div> <div>1CACCGGGTACCCATTTCCCATGGTGTTCAGCAGTTGCAGCAGGAAGGACTTTGGAGACCAGCCTGGAGAAAGGAATGGGGGTGTGCCTGTT90</div> <div>1481CACCGGGTACCCATTTCCCATGGTGTTCAGCAGTTGCAGCAGGAAGGACTTTGGAGACCAGCCTGGAGAAAGGAATGGGGGTGTGCCTGTT1570</div> <div>149015001510152015301540155015601570</div> | Matrix: DNAFULL<br>Gap open penalty: 10.0<br>Gap extend penalty: 1.0      |
|                           |           |                  | ADAM12-All - SW620 Amplicon Forward<br>ADAM12-All Isoforms  | <div>100110120130140</div> <div>91TAACCTGCCGGAAGTCAGGGAGTCTTTCCGGGGCCAGAAAGTGTGGGAACAGATTTGTGG149</div> <div>1571TAACCTGCCGGAAGTCAGGGAGTCTTTCCGGGGCCAGAAAGTGTGGGAACAGATTTGTGG1629</div> <div>15801590160016101620</div>                                                                                | Length: 149<br>Identity: 149 / 149 ( 100.00% )<br>Gaps: 0 / 149 ( 0.00% ) |
| ADAM12-<br>All<br>Reverse | SW620     | 198bp            | ADAM12-All - SW620 Amplicon Reverse<br>ADAM12-All Isoforms  | <div>102030405060708090</div> <div>1GTAGCTGTCAAATGGCGGTGAGAAAGGAGGCTGCATCATGAACGCTTCCACCGGGTACCCATTTCCCATGGTGTTCAGCAGTTGCAGCA90</div> <div>1432GTAGCTGTCAAATGGCGGTGAGAAAGGAGGCTGCATCATGAACGCTTCCACCGGGTACCCATTTCCCATGGTGTTCAGCAGTTGCAGCA1521</div> <div>144014501460147014801490150015101520</div>     | Matrix: DNAFULL<br>Gap open penalty: 10.0<br>Gap extend penalty: 1.0      |
|                           |           |                  | ADAM12-All - SW620 Amplicon Reverse<br>ADAM12-All Isoforms  | <div>100110120130140150</div> <div>91GGAAGGACTTTGGAGACCAGCCTGGAGAAAGGAATGGGGGTGTGCCTGTTAACCTGCCGGAAGTCA155</div> <div>1522GGAAGGACTTTGGAGACCAGCCTGGAGAAAGGAATGGGGGTGTGCCTGTTAACCTGCCGGAAGTCA1587</div> <div>153015401550156015701580</div>                                                             | Length: 156<br>Identity: 155 / 156 ( 99.36% )<br>Gaps: 1 / 156 ( 0.64% )  |

**Table S1B: Alignment of ADAM12-245 Primers using the sample as CCD841, SW480, and SW620 cell lines. Sanger sequencing results were aligned using SnapGene software and NCBI Blast alignment. The confidence scores 99 and 100%.**

| Gene Name          | Cell Line | Amplicon size bp | alignment                                                   |                                                                                                                                                                                                                                                                                                                                             | Gaps                                                                      |
|--------------------|-----------|------------------|-------------------------------------------------------------|---------------------------------------------------------------------------------------------------------------------------------------------------------------------------------------------------------------------------------------------------------------------------------------------------------------------------------------------|---------------------------------------------------------------------------|
| ADAM12-245 Forward | CCD841    | 205bp            | ADAM12-245 - CCD841 Amplicon Forward<br>ADAM12-245 Isoforms | <div>102030405060708090100</div> <div>1A6GAGGAAGGAGCTCAAAAGTCTGGCTTTTCACTGAGCC<del>C</del>CCACAGCAGTGGGGGAGAAGCAAGGGTTGGGCCCAAGTGTCCCCTTTCCCCAGTGACACC100</div> <div>2847A6GAGGAAGGAGCTCAAAAGTCTGGCTTTTCACTGAGCCTCCACAGCAGTGGGGGAGAAGCAAGGGTTGGGCCCAAGTGTCCCCTTTCCCCAGTGACACC2946</div> <div>2850286028702880289029002910292029302940</div> | Matrix: DNAFULL<br>Gap open penalty: 10.0<br>Gap extend penalty: 1.0      |
|                    |           |                  | ADAM12-245 - CCD841 Amplicon Forward<br>ADAM12-245 Isoforms | <div>110120130140150</div> <div>101TCAGCCTTGGCAGCCCTGATGACTGGTCTCTGGCTGCAACTTAATGCTCTGA152</div> <div>2947TCAGCCTTGGCAGCCCTGATGACTGGTCTCTGGCTGCAACTTAATGCTCTGA2998</div> <div>29502960297029802990</div>                                                                                                                                    | Length: 152<br>Identity: 151 / 152 ( 99.34% )<br>Gaps: 0 / 152 ( 0.00% )  |
| ADAM12-245 Reverse | CCD841    | 205bp            | ADAM12-245 - CCD841 Amplicon Reverse<br>ADAM12-245 Isoforms | <div>102030405060708090100</div> <div>1CTGCTCCTGAGAGAGTAGCAGGTTACCACTCTGGCAGGCCCCAGCCCTGCAGCAAGGAGGAAGAGGACTCAAAAGTCTGGCCTTTTCACTGAGCCTCCACA100</div> <div>2793CTGCTCCTGAGAGAGTAGCAGGTTACCACTCTGGCAGGCCCCAGCCCTGCAGCAAGGAGGAAGAGGACTCAAAAGTCTGGCCTTTTCACTGAGCCTCCACA2892</div> <div>2800281028202830284028502860287028802890</div>          | Matrix: DNAFULL<br>Gap open penalty: 10.0<br>Gap extend penalty: 1.0      |
|                    |           |                  | ADAM12-245 - CCD841 Amplicon Reverse<br>ADAM12-245 Isoforms | <div>110120130140150160</div> <div>101GCAGTGGGGGAGAAGCAAGGGTTGGGCCCAAGTGTCCCCTTTCCCAAGTGACACCTCAGCCT161</div> <div>2893GCAGTGGGGGAGAAGCAAGGGTTGGGCCCAAGTGTCCCCTTTCCCAAGTGACACCTCAGCCT2953</div> <div>290029102920293029402950</div>                                                                                                         | Length: 161<br>Identity: 161 / 161 ( 100.00% )<br>Gaps: 0 / 161 ( 0.00% ) |
| ADAM12-245 Forward | SW480     | 205bp            | ADAM12-245 - SW480 Amplicon Forward<br>ADAM12-245 Isoforms  | <div>102030405060708090100</div> <div>1CCAGCCCTGCAGCAAGGAGGAAGAGGACTCAAAAGTCTGGCCTTTTCACTGAGCCTCCACAGCAGTGGGGGAGAAGCAAGGGTTGGGCCCAAGTGTCCCCTT100</div> <div>2833CCAGCCCTGCAGCAAGGAGGAAGAGGACTCAAAAGTCTGGCCTTTTCACTGAGCCTCCACAGCAGTGGGGGAGAAGCAAGGGTTGGGCCCAAGTGTCCCCTT2932</div> <div>2840285028602870288028902900291029202930</div>        | Matrix: DNAFULL<br>Gap open penalty: 10.0<br>Gap extend penalty: 1.0      |
|                    |           |                  | ADAM12-245 - SW480 Amplicon Forward<br>ADAM12-245 Isoforms  | <div>110120130140150160</div> <div>101TCCCAAGTGACACCTCAGCCTTGGCAGCCCTGATGACTGGTCTCTGGCTGCAACTTAATGCTCTGA166</div> <div>2933TCCCAAGTGACACCTCAGCCTTGGCAGCCCTGATGACTGGTCTCTGGCTGCAACTTAATGCTCTGA2998</div> <div>294029502960297029802990</div>                                                                                                 | Length: 166<br>Identity: 166 / 166 ( 100.00% )<br>Gaps: 0 / 166 ( 0.00% ) |
| ADAM12-245 Reverse | SW480     | 205bp            | ADAM12-245 - SW480 Amplicon Reverse<br>ADAM12-245 Isoforms  | <div>102030405060708090100</div> <div>1CTGCTCCTGAGAGAGTAGCAGGTTACCACTCTGGCAGGCCCCAGCCCTGCAGCAAGGAGGAAGAGGACTCAAAAGTCTGGCCTTTTCACTGAGCCTCCACA100</div> <div>2793CTGCTCCTGAGAGAGTAGCAGGTTACCACTCTGGCAGGCCCCAGCCCTGCAGCAAGGAGGAAGAGGACTCAAAAGTCTGGCCTTTTCACTGAGCCTCCACA2892</div> <div>2800281028202830284028502860287028802890</div>          | Matrix: DNAFULL<br>Gap open penalty: 10.0<br>Gap extend penalty: 1.0      |
|                    |           |                  | ADAM12-245 - SW480 Amplicon Reverse<br>ADAM12-245 Isoforms  | <div>110120130140150160</div> <div>101AAGAGGACTCAAAAGTCTGGCCTTTTCACTGAGCCTCCACAGCAAGTGGGGGAGAAGCAAGG160</div> <div>2893AAGAGGACTCAAAAGTCTGGCCTTTTCACTGAGCCTCCACAGCAAGTGGGGGAGAAGCAAGG2952</div> <div>290029102920293029402950</div>                                                                                                         | Length: 160<br>Identity: 160 / 160 ( 100.00% )<br>Gaps: 0 / 160 ( 0.00% ) |
| ADAM12-245 Forward | SW620     | 205bp            | ADAM12-245 - SW620 Amplicon Forward<br>ADAM12-245 Isoforms  | <div>102030405060708090</div> <div>1CCAGCCCTGCAGC-A6GAGGAAGAGGACTCAAAAGTCTGGCCTTTTCACTGAGCCTCCACAGCAGTGGGGGAGAAGCAAGGGTTGGGCCCAAGTGTCCCCTT99</div> <div>2833CCAGCCCTGCAGCAGGAGGAAGAGGACTCAAAAGTCTGGCCTTTTCACTGAGCCTCCACAGCAGTGGGGGAGAAGCAAGGGTTGGGCCCAAGTGTCCCCTT2932</div> <div>2840285028602870288028902900291029202930</div>             | Matrix: DNAFULL<br>Gap open penalty: 10.0<br>Gap extend penalty: 1.0      |
|                    |           |                  | ADAM12-245 - SW620 Amplicon Forward<br>ADAM12-245 Isoforms  | <div>100110120130140150160</div> <div>100TCCCCAGTGACACCTCAGCCTTGGCAGCCCTGATGACTGGTCTCTGGCTGCAACTTAATGCTCTGA165</div> <div>2933TCCCCAGTGACACCTCAGCCTTGGCAGCCCTGATGACTGGTCTCTGGCTGCAACTTAATGCTCTGA2998</div> <div>294029502960297029802990</div>                                                                                              | Length: 166<br>Identity: 165 / 166 ( 99.40% )<br>Gaps: 1 / 166 ( 0.60% )  |
| ADAM12-245 Reverse | SW620     | 205bp            | ADAM12-245 - SW620 Amplicon Reverse<br>ADAM12-245 Isoforms  | <div>102030405060708090100</div> <div>1CTGCTCCTGAGAGAGTAGCAGGTTACCACTCTGGCAGGCCCCAGCCCTGCAGCAAGGAGGAAGAGGACTCAAAAGTCTGGCCTTTTCACTGAGCCTCCACA100</div> <div>2793CTGCTCCTGAGAGAGTAGCAGGTTACCACTCTGGCAGGCCCCAGCCCTGCAGCAAGGAGGAAGAGGACTCAAAAGTCTGGCCTTTTCACTGAGCCTCCACA2892</div> <div>2800281028202830284028502860287028802890</div>          | Matrix: DNAFULL<br>Gap open penalty: 10.0<br>Gap extend penalty: 1.0      |
|                    |           |                  | ADAM12-245 - SW620 Amplicon Reverse<br>ADAM12-245 Isoforms  | <div>110120130140150160</div> <div>101GCAGTGGGGGAGAAGCAAGGGTTGGGCCCAAGTGTCCCCTTTCCCAAGTGACACCTCAGCC160</div> <div>2893GCAGTGGGGGAGAAGCAAGGGTTGGGCCCAAGTGTCCCCTTTCCCAAGTGACACCTCAGCC2952</div> <div>290029102920293029402950</div>                                                                                                           | Length: 160<br>Identity: 160 / 160 ( 100.00% )<br>Gaps: 0 / 160 ( 0.00% ) |

**Table S1C: Alignment of ADAM12-245 Primers using the sample as CCD841, SW480, and SW620 cell lines. Sanger sequencing results were aligned using SnapGene software and NCBI Blast alignment. The confidence scores 99 and 100%.**

| Gene Name         | Cell Line | Amplicon size bp | alignment                                                 |                                                                                                                                                                                                                                                                                                                                              | Gaps                                                                      |
|-------------------|-----------|------------------|-----------------------------------------------------------|----------------------------------------------------------------------------------------------------------------------------------------------------------------------------------------------------------------------------------------------------------------------------------------------------------------------------------------------|---------------------------------------------------------------------------|
| ADAM12-13 Forward | CCD841    | 197bp            | ADAM12-13 - CCD841 Amplicon Forward<br>ADAM12-13 Isoforms | <div><div>1020405060708090100</div><div>1AATGTAAGCCATGCTGGAAAAATAACTGCTGAGATACATACAGAATTACTGTAAC TGATTACACTTGGTAATTGTACTAAAGCCAAACATATATATAC100</div><div>4855AATGTAAGCCATGCTGGAAAAATAACTGCTGAGATACATACAGAATTACTGTAAC TGATTACACTTGGTAATTGTACTAAAGCCAAACATATATATAC4954</div><div>4860487048804890490049104920493049404950</div></div>         | Matrix: DNAFULL<br>Gap open penalty: 10.0<br>Gap extend penalty: 1.0      |
|                   |           |                  | ADAM12-13 - CCD841 Amplicon Forward<br>ADAM12-13 Isoforms | <div><div>110120130140</div><div>101TATTA AAAAGGTTTACAGAATTTTATGGTGCA TTACGTGGGCATTG146</div><div>4955TATTA AAAAGGTTTACAGAATTTTATGGTGCA TTACGTGGGCATTG5000</div><div>49604970498049905000</div></div>                                                                                                                                        | Length: 146<br>Identity: 146 / 146 ( 100.00% )<br>Gaps: 0 / 146 ( 0.00% ) |
| ADAM12-13 Reverse | CCD841    | 197bp            | ADAM12-13 - CCD841 Amplicon Reverse<br>ADAM12-13 Isoforms | <div><div>102030405060708090100</div><div>1TCCAAC TCGTATAGCATGCATCTGTTTATTC TATAGTTATTAAGTTC TTTAA AATGTAAGCCATGCTGGAAAAATAACTGCTGAGATACATACAGAAT100</div><div>4803TCCAAC TCGTATAGCATGCATCTGTTTATTC TATAGTTATTAAGTTC TTTAA AATGTAAGCCATGCTGGAAAAATAACTGCTGAGATACATACAGAAT4902</div><div>4810482048304840485048604870488048904900</div></div> | Matrix: DNAFULL<br>Gap open penalty: 10.0<br>Gap extend penalty: 1.0      |
|                   |           |                  | ADAM12-13 - CCD841 Amplicon Reverse<br>ADAM12-13 Isoforms | <div><div>110120130140150160</div><div>101TACTGTAACTGATTACACTTGGTAATTGTACTAAAGCCAAACATATATATACTATAAAAAGGTT165</div><div>4903TACTGTAACTGATTACACTTGGTAATTGTACTAAAGCCAAACATATATATACTATAAAAAGGTT4967</div><div>491049204930494049504960</div></div>                                                                                              | Length: 165<br>Identity: 164 / 165 ( 99.39% )<br>Gaps: 0 / 165 ( 0.00% )  |
| ADAM12-13 Forward | SW480     | 197bp            | ADAM12-13 - SW480 Amplicon Forward<br>ADAM12-13 Isoforms  | <div><div>102030405060708090100</div><div>1AAATGTAAGCCATGCTGGAAAAATAACTGCTGAGATACATACAGAATTACTGTAAC TGATTACACTTGGTAATTGTACTAAAGCCAAACATATATATA100</div><div>4854AAATGTAAGCCATGCTGGAAAAATAACTGCTGAGATACATACAGAATTACTGTAAC TGATTACACTTGGTAATTGTACTAAAGCCAAACATATATATA4953</div><div>4860487048804890490049104920493049404950</div></div>       | Matrix: DNAFULL<br>Gap open penalty: 10.0<br>Gap extend penalty: 1.0      |
|                   |           |                  | ADAM12-13 - SW480 Amplicon Forward<br>ADAM12-13 Isoforms  | <div><div>110120130140</div><div>101CTATTA AAAAGGTTTACAGAATTTTATGGTGCA TTACGTGGGCATTG147</div><div>4954CTATTA AAAAGGTTTACAGAATTTTATGGTGCA TTACGTGGGCATTG5000</div><div>49604970498049905000</div></div>                                                                                                                                      | Length: 147<br>Identity: 147 / 147 ( 100.00% )<br>Gaps: 0 / 147 ( 0.00% ) |
| ADAM12-13 Reverse | SW480     | 197bp            | ADAM12-13 - SW480 Amplicon Reverse<br>ADAM12-13 Isoforms  | <div><div>102030405060708090100</div><div>1TCCAAC TCGTATAGCATGCATCTGTTTATTC TATAGTTATTAAGTTC TTTAA AATGTAAGCCATGCTGGAAAAATAACTGCTGAGATACATACAGAAT100</div><div>4803TCCAAC TCGTATAGCATGCATCTGTTTATTC TATAGTTATTAAGTTC TTTAA AATGTAAGCCATGCTGGAAAAATAACTGCTGAGATACATACAGAAT4902</div><div>4810482048304840485048604870488048904900</div></div> | Matrix: DNAFULL<br>Gap open penalty: 10.0<br>Gap extend penalty: 1.0      |
|                   |           |                  | ADAM12-13 - SW480 Amplicon Reverse<br>ADAM12-13 Isoforms  | <div><div>110120130140150</div><div>101TACTGTAACTGATTACACTTGGTAATTGTACTAAAGCCAAACATATATACT153</div><div>4903TACTGTAACTGATTACACTTGGTAATTGTACTAAAGCCAAACATATATACT4955</div><div>49104920493049404950</div></div>                                                                                                                               | Length: 153<br>Identity: 153 / 153 ( 100.00% )<br>Gaps: 0 / 153 ( 0.00% ) |
| ADAM12-13 Forward | SW620     | 197bp            | ADAM12-13 - SW620 Amplicon Forward<br>ADAM12-13 Isoforms  | <div><div>102030405060708090100</div><div>1AATGTAAGCCATGCTGGAAAAATAACTGCTGAGATACATACAGAATTACTGTAAC TGATTACACTTGGTAATTGTACTAAAGCCAAACATATATATAC100</div><div>4855AATGTAAGCCATGCTGGAAAAATAACTGCTGAGATACATACAGAATTACTGTAAC TGATTACACTTGGTAATTGTACTAAAGCCAAACATATATATAC4954</div><div>4860487048804890490049104920493049404950</div></div>       | Matrix: DNAFULL<br>Gap open penalty: 10.0<br>Gap extend penalty: 1.0      |
|                   |           |                  | ADAM12-13 - SW620 Amplicon Forward<br>ADAM12-13 Isoforms  | <div><div>110120130140</div><div>101TATTA AAAAGGTTTACAGAATTTTATGGTGCA TTACGTGGGCATT145</div><div>4955TATTA AAAAGGTTTACAGAATTTTATGGTGCA TTACGTGGGCATT4999</div><div>4960497049804990</div></div>                                                                                                                                              | Length: 145<br>Identity: 145 / 145 ( 100.00% )<br>Gaps: 0 / 145 ( 0.00% ) |
| ADAM12-13 Reverse | SW620     | 197bp            | ADAM12-13 - SW620 Amplicon Reverse<br>ADAM12-13 Isoforms  | <div><div>102030405060708090100</div><div>1TCCAAC TCGTATAGCATGCATCTGTTTATTC TATAGTTATTAAGTTC TTTAA AATGTAAGCCATGCTGGAAAAATAACTGCTGAGATACATACAGAAT100</div><div>4803TCCAAC TCGTATAGCATGCATCTGTTTATTC TATAGTTATTAAGTTC TTTAA AATGTAAGCCATGCTGGAAAAATAACTGCTGAGATACATACAGAAT4902</div><div>4810482048304840485048604870488048904900</div></div> | Matrix: DNAFULL<br>Gap open penalty: 10.0<br>Gap extend penalty: 1.0      |
|                   |           |                  | ADAM12-13 - SW620 Amplicon Reverse<br>ADAM12-13 Isoforms  | <div><div>110120130140150</div><div>101TACTGTAACTGATTACACTTGGTAATTGTACTAAAGCCAAACATATATACTAT155</div><div>4903TACTGTAACTGATTACACTTGGTAATTGTACTAAAGCCAAACATATATACTAT4957</div><div>49104920493049404950</div></div>                                                                                                                           | Length: 155<br>Identity: 155 / 155 ( 100.00% )<br>Gaps: 0 / 155 ( 0.00% ) |
