# Supplementary material for: Alternatively Spliced Isoforms of MUC4 and ADAM12 as Biomarkers for Colorectal Cancer Metastasis
Source: J Pers Med. 2023 Jan 10;13(1):135. doi: 10.3390/jpm13010135 (PMC9861497; doi:10.3390/jpm13010135)
Supplement: Supplementary file 1 [file jpm-13-00135-s001.zip]

Archive with 6 entries (6 files):
- ADAM12-All-245-13 Sanger Confidence Score.pdf
- MUC4-6 & MUC4-1 copy.pdf
- MUC4-6 & MUC4-1.pdf
- MUC4-All-16-4 Sanger Confidence Score.pdf
- Supplementary Figure S1&S2.pdf
- Supplementary Figure S4.jpg
